# Supplementary material for: Patterned forest-assembly of single-wall carbon nanotubes on gold using a non-thiol functionalization technique
Source: Royal Society of Chemistry journal article supplement (doi:10.1039/b710854k), 2007-01-01
Supplement: b710854k.pdf [file b710854k.pdf]

## Supporting Information

# **Patterned Forest-Assembly of Single-Wall Carbon Nanotubes on Gold Using a Non-Thiol Functionalization Technique**

**Haoyan Wei,<sup>a</sup> Sejong Kim,<sup>b</sup> Sang Nyon Kim,<sup>b</sup> Bryan D. Huey,<sup>a</sup> Fotios Papadimitrakopoulos<sup>\*b</sup> and  
Harris L. Marcus<sup>\*a</sup>**

<sup>a</sup> *Materials Science and Engineering Program, Department of Chemical, Materials and Biomolecular  
Engineering, Institute of Materials Science, University of Connecticut, Storrs, CT 06269, USA*

<sup>b</sup> *Nanomaterials Optoelectronics Laboratory, Polymer Program, Institute of Materials Science,  
Department of Chemistry, University of Connecticut, Storrs, CT 06269, USA*

*\* To whom correspondence should be addressed.*

*E-mail: [hmarcus@mail.ims.uconn.edu](mailto:hmarcus@mail.ims.uconn.edu), [papadim@mail.ims.uconn.edu](mailto:papadim@mail.ims.uconn.edu)*

*Harris L. Marcus: Tel: (+01) 860 486 4623. Fax: (+01) 860 486 4745.*

*Fotios Papadimitrakopoulos: Phone: (+01) 860 486 3447. Fax: (+01) 860 486 4745.*

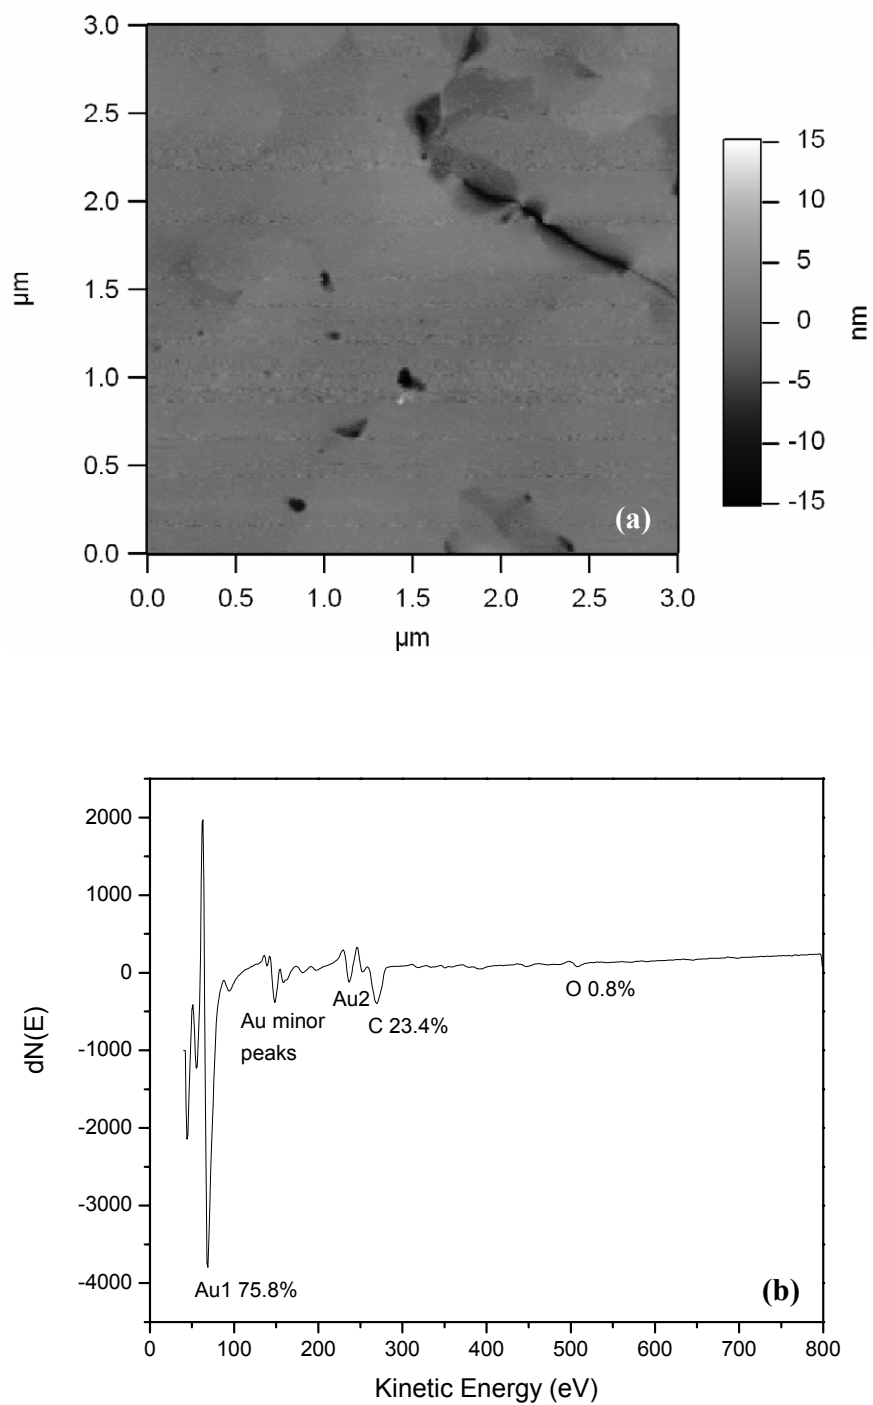

**Fig. S1** a) AFM micrograph of surface topology and b) Auger spectrum of Pico Au (111) substrate after immersion into  $\text{Fe}_2(\text{SO}_4)_3$  solution for 15 min followed by a brief  $\text{H}_2\text{SO}_4$  and DMF wash.

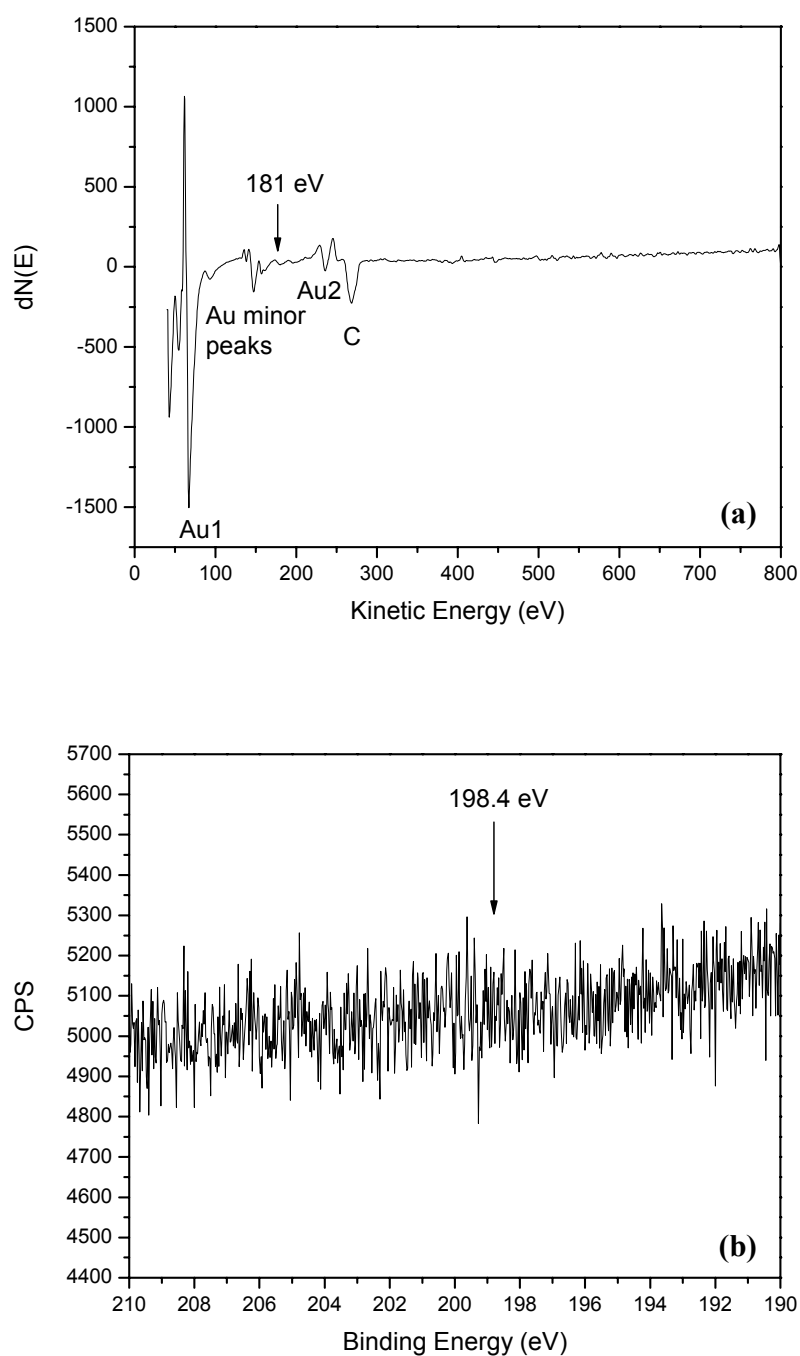

**Fig. S2** a) Auger and b) XPS spectra of Pico Au (111) substrate after immersion into pH 2.2 HCl aqueous solution for 15 min. No evidence of chlorine adsorption on Au surface was found. The arrows in b) indicate the peak position where Cl is supposed to be.

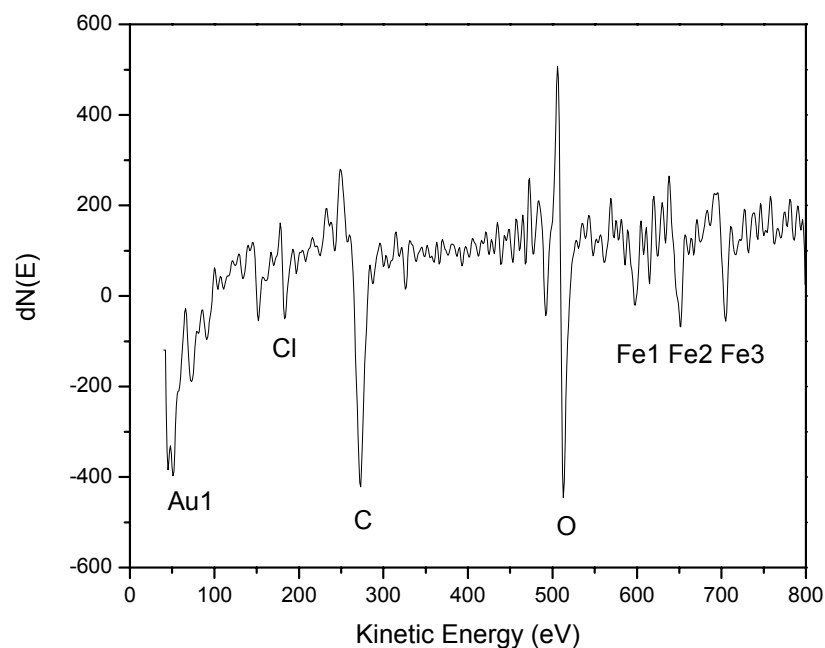

**Fig. S3** Typical Auger survey taken in Au domains on FeO(OH)-FeOCl/Au strip patterns by photolithographic lift-off process. Higher carbon content was observed in comparison with the uniform FeO(OH)-FeOCl/Au samples (Fig. 2b).
